# Supplementary material
Source: PubMed Central journal article supplement (PMC5151556)
Supplement: 40352_2013_6_MOESM1_ESM.pdf [file 40352_2013_6_MOESM1_ESM.pdf]

## Design Overview and Planned Timeline\*

|           |                                                                                                                                                                                                                                                                |                                                                                                                                                                                                   |
|-----------|----------------------------------------------------------------------------------------------------------------------------------------------------------------------------------------------------------------------------------------------------------------|---------------------------------------------------------------------------------------------------------------------------------------------------------------------------------------------------|
|           | <i>Facilitator Training</i><br>(Initial 2-day face-to-face meeting and weekly conference calls)                                                                                                                                                                |                                                                                                                                                                                                   |
| 1 month   | <i>Baseline Data Collection: Early-Start and Delayed-Start Sites</i> <ul style="list-style-type: none"> <li>✓ BSOC Surveys</li> <li>✓ Study-Specific Surveys</li> <li>✓ Case Plan Ratings</li> </ul> <i>Randomization to Early-Start or Delayed-Start Site</i> |                                                                                                                                                                                                   |
| 12 months | <i>Early-Start Sites</i><br><br>OPII Intervention<br>1. Start-up Phase Activities<br>2. Needs Assessment<br>3. Process Improvement Planning<br>4. Implementation<br>5. Sustainability/Follow-up                                                                | <i>Delayed-Start Sites</i><br><br>No Intervention                                                                                                                                                 |
| 6 months  | <i>Follow-up Data Collection: Early-Start and Delayed-Start Sites</i> <ul style="list-style-type: none"> <li>✓ Study-Specific Surveys</li> <li>✓ Change Team/Agency Staff Interviews</li> <li>✓ Case Plan Ratings</li> </ul>                                   |                                                                                                                                                                                                   |
| 12 months | <i>Early-Start Sites</i><br><br>No Intervention                                                                                                                                                                                                                | <i>Delayed-Start Sites</i><br><br>OPII Intervention<br>1. Start-up Phase Activities<br>2. Needs Assessment<br>3. Process Improvement Planning<br>4. Implementation<br>5. Sustainability/Follow-up |
| 6 months  | <i>Follow-up Data Collection Delayed-Start Sites</i> <ul style="list-style-type: none"> <li>✓ Study-Specific Surveys</li> <li>✓ Change Team/Agency Staff Interviews</li> <li>✓ Case Plan Ratings</li> </ul>                                                    |                                                                                                                                                                                                   |

\* See text for description of data collection forms.

OPII = Organizational Process Improvement Intervention

BSOC = Baseline Survey of Organizational Characteristics
